# Supplementary material
Source: PubMed Central journal article supplement (PMC3715551)
Supplement: NIHMS489117-supplement-supplement_1.pdf [file NIHMS489117-supplement-supplement_1.pdf]

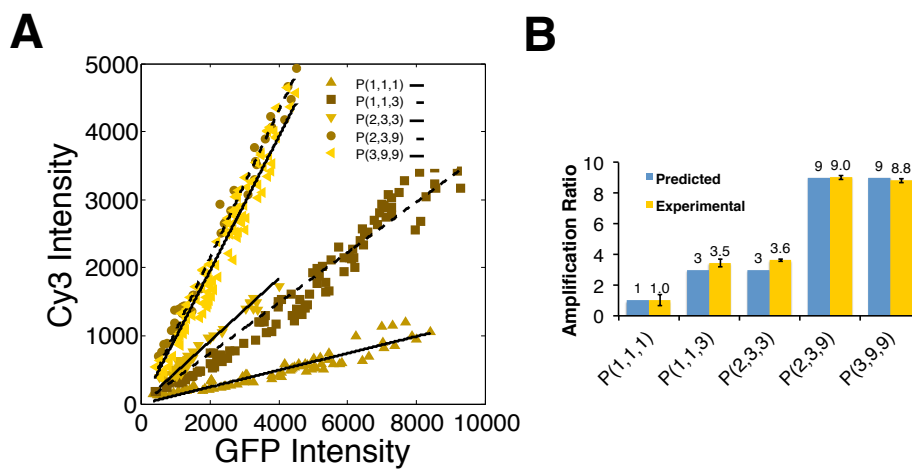

**Figure S2:** (A) Correlations between average DNA-probe and GFP intensities. Each plot shows the average intensities of the nuclear regions of at least cells. The lines through the data indicate least square fits to the data ( $R^2$  ranges from 0.84-0.98). (B) Comparisons of theoretical and measured amplification ratios for the reporting complexes analyzed in C. Theoretical amplification ratios indicate the maximum number dyes that can be integrated into a complex. Experimental ratios are determined by dividing the slopes from the fits in C by the slope obtained using a linear complex containing a single dye: the P(1,1,1) complex. Error bars indicate standard deviation from fitted regression for each point

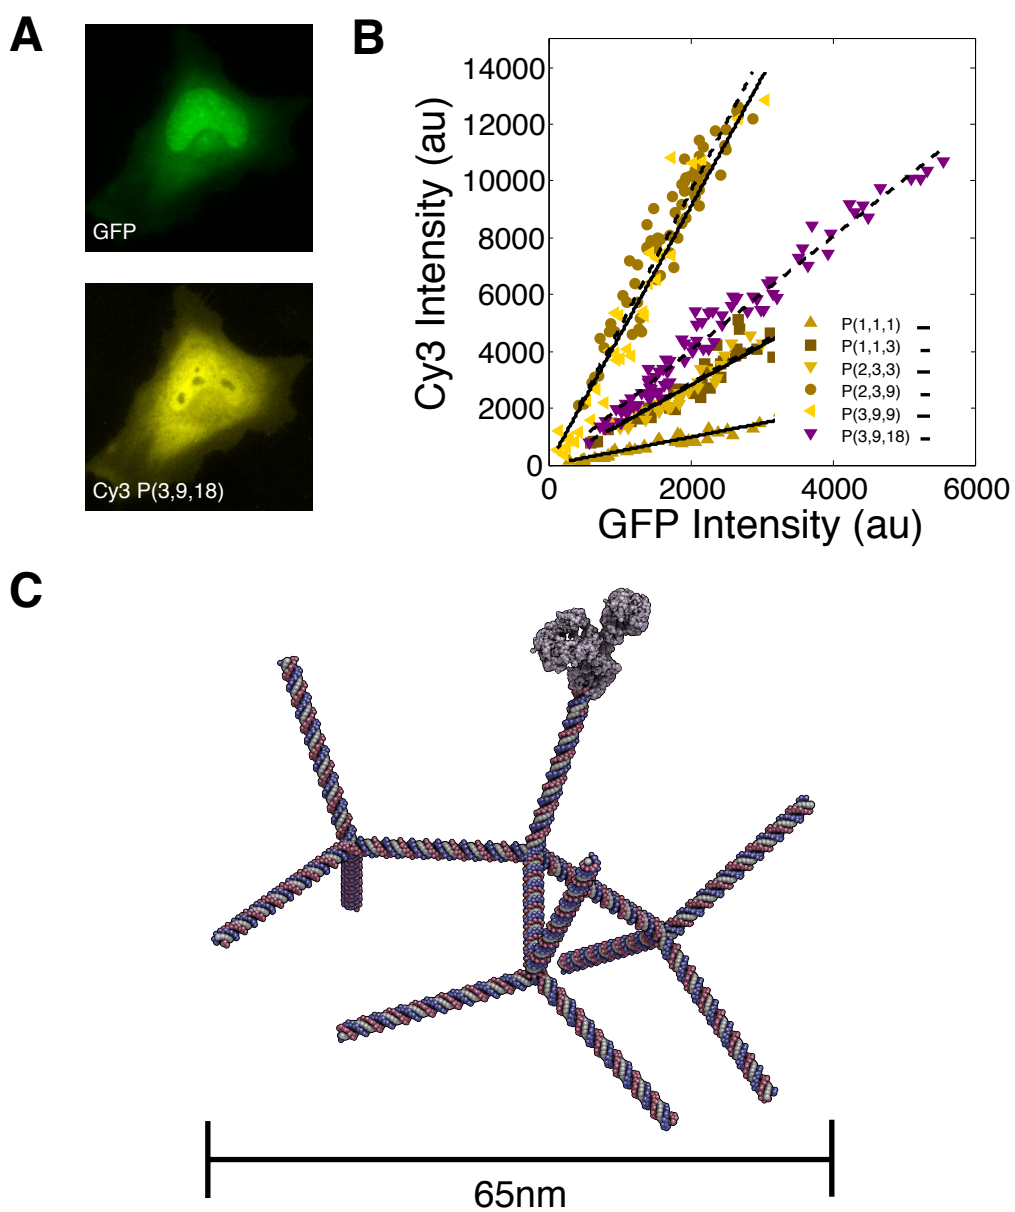

**Figure S3:** Summary of P(3,9,18) data. **(A)** Representative GFP and Cy3 image of P(2,9,18) similar to Figure 2A. **(B)** Linear correlation plot for P(2,9,18) (purple) plotted over previously shown data **(C)** Representative image of tetrahedral structure made using NanoEngineer1 software

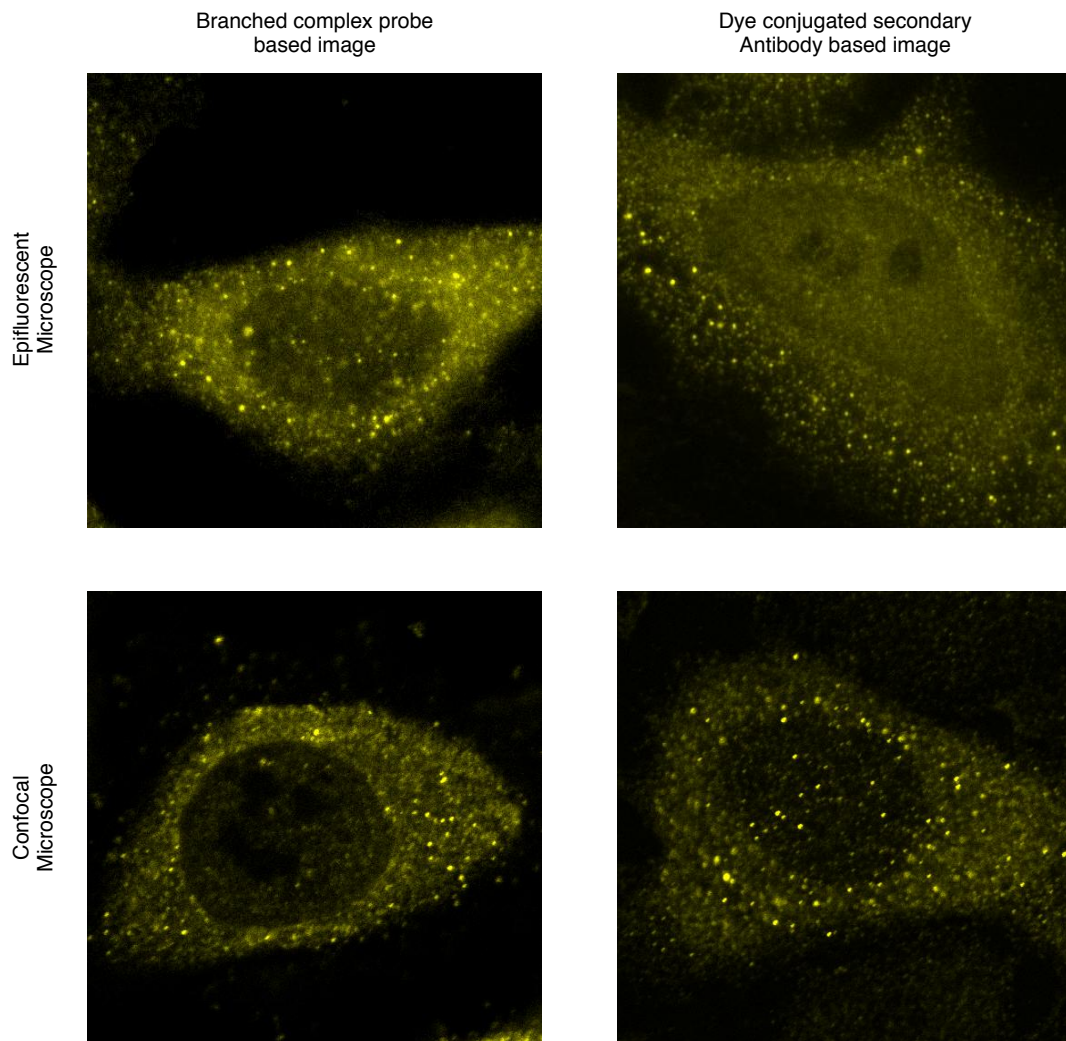

**Figure S4:** Representative images from stathmin labeling control experiments. Images are from both DNA based branched complex probes and from dye conjugated secondary antibodies as well as from both epifluorescent and confocal microscopes. Images show similar extents of label in cytoplasmic regions as well as similar degrees of textured punctate staining indicating labeling of stathmin-1.

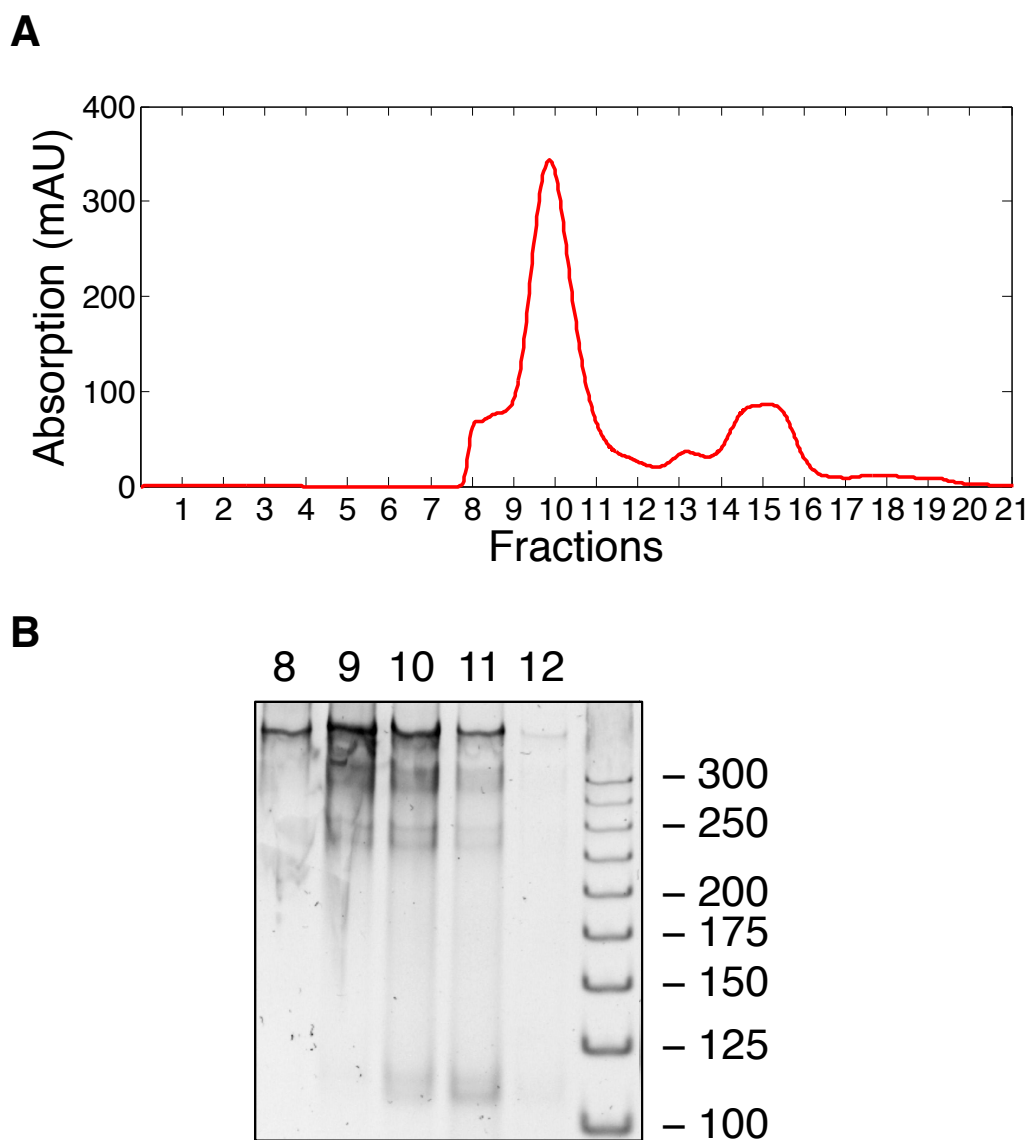

**Figure S5:** Purification of branching complexes. **(A)** Representative FPLC chromatogram. Fully annealed complexes are present in highest concentrations in Fractions 9,10,11. These fractions are used in downstream purification. **(B)** Verification native PAGE gel. Lanes 8-12 Show fractions (8-12) for P(2,9,9) complex 1 followed by the 25bp ladder (Promega), Gels show sufficient purifications of fully formed complexes.

**Table S1.** List of oligonucleotide sequences used in design of DNA probe complexes. /5Hexynyl/, /5AmMC6/, /5Cy3/, /3IABkFQ/ indicate a 5' hexynyl, 5' amine, Cy3, 3' Iowa Black FQ quencher modification, respectively. T signifies Target Strand. BC signifies Branched Complex.

| Target Strands                      | Amine Strands                                                                                   |
|-------------------------------------|-------------------------------------------------------------------------------------------------|
| <b>P(2,3,3) T &amp; P(2,3,9) T</b>  | /5AmMC6/ TTTTTTTTTTGG CCA CCG AGA CAA TAC GCA GGA CCC                                           |
| <b>P(1,1,1) T &amp; P(1,1,3) T</b>  | /5AmMC6/ TTTTTTTTTTGT GTA CCG GAA ACA TCG GCG AAT TAG                                           |
| <b>P(3,3,9) T &amp; P(3,3,18) T</b> | /5AmMC6/ TTTTTTTTTTTT ACG CGG TAC ACC TGT GCG GAT ATA                                           |
|                                     |                                                                                                 |
|                                     | Hexynyl Strands                                                                                 |
| <b>P(2,3,3) T &amp; P(2,3,9) T</b>  | /5Hexynyl/ TTTTTTTTTTGG CCA CCG AGA CAA TAC GCA GGA CCC                                         |
| <b>P(1,1,1) T &amp; P(1,1,3) T</b>  | /5Hexynyl/ TTTTTTTTTTGT GTA CCG GAA ACA TCG GCG AAT TAG                                         |
| <b>P(3,3,9) T &amp; P(3,3,18) T</b> | /5Hexynyl/ TTTTTTTTTTTT ACG CGG TAC ACC TGT GCG GAT ATA                                         |
|                                     |                                                                                                 |
| <b>P(2,3,3) &amp; P(2,3,9) BC1</b>  | Long Strands                                                                                    |
| BC1-1                               | ACT TAA TGA ACG CTA GCA TCA CGC CGG TAC TTA CAA GGT ATA GTA TAC CAG GAG GGC TTG TCA ACC         |
| BC1-2                               | TTG TAA GTA CCG GCG TGA GAG ACC GTT AAG CTA CCT GCG AGT GTA CCG GAA ACA TCG GCG AAT TAG         |
| BC1-3                               | AGG TAG CTT AAC GGT CTC ATA GGC ACA GAT CGA ACC GCT CGT GTA CCG GAA ACA TCG GCG AAT TAG         |
| BC1-4                               | GGT TCG ATC TGT GCC TAT TGC TAG CGT TCA TTA AGT GCC AGT GTA CCG GAA ACA TCG GCG AAT TAG         |
|                                     | Covering Strands                                                                                |
| BC1-5                               | AAG GTA TAG TAT ACC AGG AGG GCT TGT C                                                           |
| BC1-6                               | AAA AAA AAT TCG CCG ATG TTT CCG AC                                                              |
|                                     |                                                                                                 |
| <b>P(3,9,9) &amp; P(3,9,18) BC2</b> | Long Strands                                                                                    |
| BC2-1                               | CAC TGT TCA CTT CAC GCT TTG GTC GCT TCC ACG AAC GAG CAT CCA TGT GAG GGC GCT TAT TGT ATT CAG AGA |
| BC2-2                               | GTT CGT GGA AGC GAC CAA TAC TCG TTT CAC CGT CAA CCT GCG GTC TGG CGA ATG TAG CGT ATG TGC TC      |
| BC2-3                               | TTG ACG GTG AAA CGA GTA ATT GAC GTA TGC TGG TTC CGA GAG GTC TGG CGA ATG TAG CGT ATG TGC TC      |
| BC2-4                               | GAA CCA GCA TAC GTC AAT AGC GTG AAG TGA ACA GTG GAA TGT GTC TGG CGA ATG TAG CGT ATG TGC TC      |
|                                     | Covering Strands                                                                                |
| BC2-5                               | CAA ATA CAA TAA GCG CCC TCG TGC AA                                                              |
| BC2-6                               | GTA TGA GCA CAT ACG CTA CAT TCG TT                                                              |
|                                     |                                                                                                 |
| <b>P(3,9,9) &amp; P(3,9,18) BC3</b> | Long Strands                                                                                    |
| BC3-1                               | GAA TCC GAG AAG GTC GAA TCG CAC GAC ATT CCG GTG ATT TGG ACG CAG GCA CAT ACG CTA CAT TCG CCA GAC |
| BC3-2                               | CAC CGG AAT GTC GTG CGA GCG AGA AAT CAC AGC ATA CGC GTT TTA CGC GGT ACA CCT GTG CGG ATA TA      |
| BC3-3                               | TAT GCT GTG ATT TCT CGC TGA CAC CAA GGC AAC CAT GAT CTA TTA CGC GGT ACA CCT GTG CGG ATA TA      |
| BC3-4                               | ATG GTT GCC TTG GTG TCA TTC GAC CTT CTC GGA TTC GTT TAG TTA CGC GGT ACA CCT GTG CGG ATA TA      |
|                                     | Covering Strands                                                                                |
| BC3-5                               | AAC GAA TGT AGC GTA TGT GCT CAT AC                                                              |
| BC3-6                               | AAA AAA AAA TAT CCG CAC AGG TGT ACC AT                                                          |
|                                     |                                                                                                 |
| <b>Dye Complex Strands</b>          |                                                                                                 |
| P(1,1,1) & P(2,3,3) Q               | CGT AAT AGC GCT AGT CTC/3IABkFQ/                                                                |
| P(1,1,1) & P(2,3,3) D               | /5Cy3/TTTCTT GTC AAT TCG CCG ATG TTT CCG GTA CAC                                                |
| P(1,1,1) & P(2,3,3) L               | GT CGG AAA CAT CGG CGA ATT TTT TTT GAG ACT AGC GCT ATT ACG                                      |
| P(1,1,3) & P(2,3,9) Q               | /5Cy3/TTTCTT GTC AAT TCG CCG ATG TTT CCG GTA CAC/3Cy3Sp/                                        |
| P(1,1,3) & P(2,3,9) L               | /5Cy3/GT CGG AAA CAT CGG CGA ATT TTT TTT GAG ACT AGC GCT ATT ACG                                |
| P(3,9,9) D                          | /5Cy3/TTT CAA ACG TAT CCG CAC AGG TGT ACC GCG TAA                                               |
| P(3,9,9) L                          | AT GGT ACA CCT GTG CGG ATA TTT TTT TTT TTT GAG ACT AGC GCT ATT ACG                              |
| P(3,9,18) D                         | /5Cy3/TTT CAA ACG TAT CCG CAC AGG TGT ACC GCG TAA /3Cy3Sp/                                      |
| P(3,9,18) L                         | AT GGT ACA CCT GTG CGG ATA TTT TTT TTT TTT GAG ACT AGC GCT ATT ACG                              |

- [1] A. H. Hopman, F. C. Ramaekers, E. J. M. Speel, *J. Histochem. Cytochem.* **1998**, *46*, 771–777.
- [2] J. M. Ness, R. S. Akhtar, C. B. Latham, K. A. Roth, *J. Histochem. Cytochem.* **2003**, *51*, 981–987.
- [3] S. F. Kingsmore, D. D. Patel, *Curr. Opin. Biotechnol.* **2003**, *14*, 74–81.
- [4] H. M. T. Choi, J. Y. Chang, L. A. Trinh, J. E. Padilla, S. E. Fraser, N. A. Pierce, *Nat. Biotechnol.* **2010**, *28*, 1208–U103.
- [5] R. M. Dirks, N. A. Pierce, *Proc. Natl. Acad. Sci. U.S.A.* **2004**, *101*, 15275–15278.
- [6] H. Parsa, R. Upadhyay, S. K. Sia, *Proc. Natl. Acad. Sci. U.S.A.* **2011**, *108*, 5133–5138.
- [7] M. Schieker, C. Pautke, F. Haasters, J. Schieker, D. Docheva, W. Böcker, H. Guelkan, P. Neth, M. Jochum, W. Mutschler, *J. Anat.* **2007**, *210*, 592–599.
- [8] L. Gao, R. T. Kester, T. S. Tkaczyk, *Opt. Express.* **2009**, *17*, 12293–12308.
- [9] A. Raj, P. van den Bogaard, S. A. Rifkin, A. van Oudenaarden, S. Tyagi, *Nat. Meth.* **2008**, *5*, 877–879.
- [10] A. M. Femino, F. S. Fay, K. Fogarty, R. H. Singer, *Science* **1998**, *280*, 585–590.
- [11] J. M. Levisky, R. H. Singer, *J. Cell Sci.* **2003**, *116*, 2833–2838.
- [12] D. Y. Zhang, E. Winfree, *J. Am. Chem. Soc.* **2009**, *131*, 17303–17314.
- [13] D. Y. Zhang, A. J. Turberfield, B. Yurke, E. Winfree, *Science* **2007**, *318*, 1121.
- [14] D. Y. Duose, R. M. Schweller, J. Zimak, A. R. Rogers, W. N. Hittelman, M. R. Diehl, *Nucleic Acids Res.* **2011**, 1–10.
- [15] D. Y. Duose, R. M. Schweller, W. N. Hittelman, M. R. Diehl, *Bioconj. Chem.* **2010**, *21*, 2327–2331.
- [16] D. Lubrich, S. J. Green, A. J. Turberfield, *J. Am. Chem. Soc.* **2009**, *131*, 2422–2423.
- [17] P. Yin, H. M. T. Choi, C. R. Calvert, N. A. Pierce, *Nature* **2008**, *451*, 318–322.
- [18] A. J. Genot, D. Y. Zhang, J. Bath, A. J. Turberfield, *J. Am. Chem. Soc.* **2011**, *133*, 2177–2182.
- [19] R. M. Schweller, J. Zimak, D. Y. Duose, W. N. Hittelman, *Angew. Chem. Int. Ed.* **n.d.**
- [20] J.-S. Shin, N. A. Pierce, *J. Am. Chem. Soc.* **2004**, *126*, 10834–10835.
- [21] D. Y. Zhang, G. Seelig, *Nat Chem* **2011**, *3*, 103–113.
- [22] E. Winfree, *J. Biomol. Struct. Dyn.* **2000**, 263–270.
- [23] R. M. Schweller, P. E. Constantinou, N. W. Frankel, P. Narayan, M. R. Diehl, *Bioconj. Chem.* **2008**, *19*, 2304–2307.
- [24] J. R. Moll, S. B. Ruvinov, I. Pastan, C. Vinson, *Protein Sci.* **2001**, *10*, 649–655.
- [25] X. Wang, N. C. Seeman, *J. Am. Chem. Soc.* **2007**, *129*, 8169–8176.
- [26] N. C. Seeman, N. R. Kallenbach, *Annu. Rev. Biophys. Biomol. Struct.* **1994**, *23*, 53–86.
- [27] A. Carbone, N. C. Seeman, *Natural Computing* **2003**, *2*, 133–151.
- [28] J. Guo, S. Wang, N. Dai, Y. N. Teo, E. T. Kool, *Proc. Natl. Acad. Sci. U.S.A.* **2011**, *108*, 3493–3498.
